# Supplementary material
Source: PubMed Central journal article supplement (PMC6263814)
Supplement: NIHMS984369-supplement-1.pdf [file NIHMS984369-supplement-1.pdf]

**Supplemental Materials For:**

Attained SES as a moderator of adult cognitive performance:

Testing gene-environment interaction in various cognitive domains

*The authors have composed the Integral Supplemental Materials to include additional information regarding methods, results, tables, and figures that will contribute to interested readers' understanding and are relevant to any interest in replication.*

**Supplemental Materials Table of Contents:**

- I. Supplemental Methods**
- II. Supplemental Results**
- III. Supplemental Tables**

*Table S1.* Mixed Effects Regression Analyses accounting for pair dependencies.

*Table S2.* Mixed Effects Regression Analyses including Attained SES Linear and Quadratic Terms

*Table S3.* Fit Statistics and Power for household-level Attained SES moderation of cognitive performance: adjusted for sex.

*Table S4.* Estimated parameters from Attained SES moderation of Cognitive Performance, best fitting model with confidence intervals

*Table S5.* Parameter estimates for household-level Attained SES moderation of Symbol Digit performance by region, adjusted for age moderation, and average effects of sex.

*Table S6.* Testing for direction of moderation

*Table S7:* Twin Correlations and cross-trait correlations for attained SES and cognitive test scores by Birth Cohorts before and after 1940

- IV. Supplemental Figures**

*Figure S1.* Raw Variances in cognitive performance for the Full Moderation Model with household-level Attained SES

*Figure S2.* Raw Variances in cognitive performance by Age, adjusted for household-level Attained SES moderation

*Figure S3.* Raw Variances in cognitive performance by household-level Attained SES, adjusted for rearing SES & age moderation

*Figure S4.* Raw Variances in cognitive performance by rearing SES, adjusted for household level attained SES & Age moderation.

*Figure S5.* Raw Variances in cognitive performance moderated by rearing SES, univariate model adjusted for age moderation and mean-level sex effects.

*Figure S6.* Raw Variances in cognitive performance for the Full Moderation Model with participant's individually-attained SES

*Figure S7:* Full Bivariate Moderation model comparison for Symbol Digit, using an ACE model for Symbol Digit on the top row and the AE model (no C for cognitive) on the bottom row.

*Figure S8:* Distribution of participants' ages. Due to the composition of the cohort studies in IGEMS, age is correlated about .96 with birth year.

**Full Acknowledgement:** IGEMS is supported by the U.S. National Institutes of Health grant R01 AG037985. SATSA was supported by grants R01 AG04563, R01 AG10175, the MacArthur Foundation Research Network on Successful Aging, the Swedish Council For Working Life and Social Research (FAS) (97:0147:1B, 2009-0795) and Swedish Research Council (825-2007-7460, 825-2009-6141). OCTO-Twin was supported by grant R01 AG08861. Gender was supported by the MacArthur Foundation Research Network on Successful Aging, The Axel and Margaret Ax:son Johnson's Foundation, The Swedish Council for Social Research, and the Swedish Foundation for Health Care Sciences and Allergy Research. TOSS was supported by grant R01 MH54610 from the National Institute of Health. The Danish Twin Registry is supported by grants from The National Program for Research Infrastructure 2007 from the Danish Agency for Science and Innovation, the Velux Foundation and the US National Institute of Health (P01 AG08761). The Minnesota Twin Study of Adult Development and Aging was supported by NIA grant R01 AG 06886. VETSA was supported by National Institute of Health grants NIA R01 AG018384, R01 AG018386, R01 AG022381, R01 AG022982, R01 AG050595, and, in part, with resources of the VA San Diego Center of Excellence for Stress and Mental Health. The Cooperative Studies Program of the Office of Research & Development of the United States Department of Veterans Affairs has provided financial support for the development and maintenance of the Vietnam Era Twin (VET) Registry. This MIDUS study was supported by the John D. and Catherine T. MacArthur Foundation Research Network on Successful Midlife Development and by National Institute on Aging Grant AG20166. The content of this manuscript is solely the responsibility of the authors and does not necessarily represent the official views of the NIA/NIH, or the VA.

## I. Supplemental Method

### Measures

**Cognitive Measures.** The cognitive tests used in the current study reflect those tests available for harmonization across more than one study in the IGEMS consortium, and do not reflect the full cognitive batteries available in each separate sample. Due to differences in administration and scoring across studies, it was necessary to re-scale the cognitive scores to a common metric. Participants were divided into the following four age groups based on availability of data across the cognitive tests: below 50, 50 to 59.99, 60 to 69.99, and 70 plus. Samples from the Swedish studies were pooled due to similarity in test procedures. Similarly, the two Danish studies were pooled as well. After using regression to adjust for the main effect of sex for each test within these study-country combinations, scores for each cognitive test were placed on a T-score scale ( $M = 50$ ,  $SD = 10$ ) in 10-year age groups relative to the 50-59.99 year age groups. Cognitive test scores were then winsorized within age group, limiting scores to the  $\pm 3$  SD range from the age group mean.

**Attained SES.** As noted in the main article, harmonization of SES was conducted with all available data in the full IGEMS sample (i.e. 9 twin studies). Initially, participants identifying as housewives/husbands were scored zero on this harmonized SES scale. We considered it reasonable to use spousal occupation information as the attained SES score for housewives/husbands where available because, in our largely older-aged cohorts, significant portions of participants were categorized as housewives and among married individuals, resource-related associations tend to be shared. Though elective use of resources (for example, family financial planning and choice of leisure activities) tends to be associated with individual level of education (Antonides, 2011), large portions of our older cohorts were employed in

agrarian occupations, and it is likely that farm wives engaged in similar daily activities as their husbands.

To standardize attained SES scores across studies, participants were split into five age groups: below 50, 50 to 59.99, 60 to 69.99, and 70 to 79.99, and 80 plus due to likely cohort differences in SES structure as experienced by different age groups and differences in heritability and nonshared environmental influences in late life (Finkel & Reynolds, 2009; Johnson, McGue, & Deary, 2014; Reynolds et al., 2005). To control potential country differences, SES scores were first z-scored within country, with ages 50 to 59.99 as the referent group (i.e. means and standard deviations in the other groups were stated relative to those in this group, placing all on the same scale). Then, all SES values were linearly transformed to a T-score scale with a mean of 50 and a standard deviation of 10 in the ages 50 to 59.99.

**Rearing SES.** As for attained SES, parents coded as housewife/husband were scored 0 and excluded from the analyses if no occupational information was available for the other parent. Reports of twins reared together were averaged for mothers' and fathers' occupation. In the full IGEMS sample of twin pairs reared together the correlation between each twin's report for rearing SES was 0.82, with 79% of twins reporting zero difference (note these descriptives exclude VETSA in which rearing SES was averaged between twins prior to inclusion in IGEMS). For twins reared apart, the correlation for rearing SES was 0.32. The highest occupation score of the two parents was taken as the pair's rearing SES, except that we retained the individual reports for twins reared apart (182 twin pairs in SATSA; 6 twin pairs in MTSADA).

**Individually-attained SES.** For sensitivity analyses, participants' individual-attained SES (rather than the aforementioned household-level indicator) was constructed using only

participant's reported occupation. In this case, an attained SES score of 0 was retained for housewives/husbands and used in the analyses. Individually-attained SES was standardized in the same manner as household-level attained SES, by age group and country, and put on a T-score scale with a mean of 50 and a standard deviation of 10 in the ages 50 to 59.99. In this subsample, just over 50% of the participants were women (total N=12,055).

### **Statistical Analysis**

This Purcell model has previously been used in studies using some of the twin samples included in IGEMS (Johnson, Deary, McGue, & Christensen, 2009; Johnson & Krueger, 2005). van der Sluis, Posthuma, and Dolan (2012) has noted that the Purcell (2002) univariate moderation model can indicate false moderation when the moderator is shared by the twins and is correlated with the outcome, but this situation was not relevant to the bivariate model used in these analyses, as each twin had individually-coded attained SES.

## **II. Supplemental Results**

### **Age moderation of cognitive performance**

Age moderation analyses of Synonyms, controlling for attained SES, indicated greater variance in cognitive performance for older individuals, largely due to greater genetic influences, as well as shared and nonshared environmental variances (see Figure S2). Age moderation analyses indicated generally stable overall variance for Digits Forward in older individuals, but with smaller genetic influences and greater nonshared and shared environmental influences at older ages (see Figure S2). Age moderation analyses of Digits Backward indicated very little difference in total variance for cognitive performance, but with evidence of smaller genetic influences and greater shared and nonshared environmental influences at older ages (see Figure S2). For Block Design, age moderation analyses indicated less variance in cognitive performance

for older individuals due to smaller contributions of shared environmental influences and additive genetic influences at older ages. There was also evidence of greater nonshared environmental influences for older individuals' performance on Block Design (see Figure S2). For Symbol Digit, greater variance in cognitive performance for older individuals was observed, largely due to greater genetic influences, with smaller contributions of nonshared environmental influences (see Figure S2).

**Differences by Region.** For Symbol Digit, the patterns of overall A variance were very similar between regions, but for the U.S. sample this was a function of moderation on the unique path ( $\beta_{XU}$ ) whereas for the Scandinavian samples it was due to moderation on the common path ( $\beta_{XC}$ ). Given the common moderation observed in the Scandinavian sample, we conducted a test for uniformly nonlinear main effects, which was not significant [ $\chi^2(1) = 0.61, p = 0.433$ ]. That said, the betas ( $\beta_{XC}, \beta_{XU}$ ) offset each other in direction, one negative, one positive (Supplemental Table S4); this is most strongly evident in the Scandinavian and full-sample analyses and less so in the U.S. sample where moderation of unique variance dominated. This suggested that neither the moderation model nor nonlinear main effects model captured the full picture. Unfortunately, we cannot determine if these results are due to test type confounding with country/region or whether they may indicate real regional differences in mechanisms for moderation. Fuller examinations of regional differences in other studies are required to identify the mechanisms relating attained SES to cognitive abilities at both population and individual levels.

**Rearing SES adjustments.** As noted in the main paper, bivariate moderation models including rearing SES and attained SES as moderators of adult cognitive performance (Figure S3) produced patterns of moderation by attained SES on the ACE variance components similar to the main results (Figure 3). Estimates from univariate models with rearing SES as a moderator of

adult cognitive performance for Synonyms (verbal) and Symbol Digit (perceptual speed) are shown in Figure S5. Results for rearing SES moderation patterns are consistent between the bivariate and univariate model, indicating that less variance in cognitive performance at high levels of rearing SES is due mainly to suppression of genetic effects, and showing nonshared environmental effects remain fairly steady.

### **Individually-attained SES as a moderator**

In comparing the full model results between household-level attained SES and participants' individually-attained SES (see Figures S1 and S6), for the most part, we see the same general trends in how attained SES moderates adult cognitive performance such that genetic influences on the common pathway are slightly larger at high levels of individually-attained SES compared to low individually-attained SES. For the unique pathway, genetic influences were relatively stable or suppressed at high levels of individually-attained SES. Notably, these moderation trends were also evident for Symbol Digit, with unique genetic variance stable by level of individually-attained SES. In comparison to the household-level SES indicator, we do see clearer shifts in shared environmental variance on the Unique pathway, with attenuated effects evident at high levels of individually-attained SES.



Table S1 *Mixed Effects Regression Analyses accounting for pair dependencies*

| <b>Effect</b>              | <b>B</b> | <b>SE (B)</b> | <b>DF</b> | <b>t</b> | <b>P</b> |
|----------------------------|----------|---------------|-----------|----------|----------|
| <b>Attained SES</b>        |          |               |           |          |          |
| Intercept                  | 49.256   | 0.14          | 6096      | 350.56   | <.01     |
| Sex                        | -0.277   | 0.19          | 6097      | -1.45    | .15      |
| Age (years)                | -0.169   | 0.01          | 6097      | -20.89   | <.01     |
| <b>Rearing SES</b>         |          |               |           |          |          |
| Intercept                  | 50.469   | 0.13          | 5885      | 380.11   | <.01     |
| Sex                        | -0.003   | 0.05          | 5867      | -0.06    | .96      |
| Age (years)                | -0.057   | 0.01          | 5867      | -5.46    | <.01     |
| <b>Synonyms</b>            |          |               |           |          |          |
| Intercept                  | 48.408   | 0.23          | 2267      | 207.68   | <.01     |
| Sex                        | -1.170   | 0.34          | 2035      | -3.49    | <.01     |
| Attained SES               | 0.285    | 0.02          | 2035      | 18.17    | <.01     |
| Age (years)                | -0.123   | 0.01          | 2035      | -8.69    | <.01     |
| Attained SES * Age (years) | 0.004    | 0.00          | 2035      | 3.77     | <.01     |
| <b>Symbol Digit</b>        |          |               |           |          |          |
| Intercept                  | 45.818   | 0.18          | 3845      | 248.79   | <.01     |
| Sex                        | 0.853    | 0.24          | 3169      | 3.62     | <.01     |
| Attained SES               | 0.253    | 0.01          | 3169      | 21.58    | <.01     |
| Age (years)                | -0.542   | 0.01          | 3169      | -45.88   | <.01     |
| Attained SES * Age (years) | 0.003    | 0.00          | 3169      | 2.48     | .01      |
| <b>Digits Forward</b>      |          |               |           |          |          |
| Intercept                  | 49.741   | 0.16          | 4146      | 305.23   | <.01     |
| Sex                        | 0.186    | 0.24          | 3709      | 0.79     | .43      |
| Attained SES               | 0.166    | 0.01          | 3709      | 14.34    | <.01     |
| Age (years)                | -0.050   | 0.01          | 3709      | -4.23    | <.01     |
| Attained SES * Age (years) | -0.001   | 0.00          | 3709      | -0.78    | .43      |
| <b>Digits Backward</b>     |          |               |           |          |          |
| Intercept                  | 49.211   | 0.15          | 4639      | 318.77   | <.01     |
| Sex                        | 0.335    | 0.22          | 4078      | 1.52     | .13      |
| Attained SES               | 0.163    | 0.01          | 4078      | 15.54    | <.01     |
| Age (years)                | -0.128   | 0.01          | 4078      | -12.14   | <.01     |
| Attained SES * Age (years) | 0.003    | 0.00          | 4078      | 2.77     | <.01     |
| <b>Block Design</b>        |          |               |           |          |          |
| Intercept                  | 46.147   | 0.39          | 1191      | 119.60   | <.01     |
| Sex                        | 0.795    | 0.44          | 952       | 1.81     | .07      |
| Attained SES               | 0.222    | 0.02          | 952       | 9.23     | <.01     |
| Age (years)                | -0.381   | 0.02          | 952       | -19.85   | <.01     |
| Attained SES * Age (years) | -0.002   | 0.00          | 952       | -1.11    | .25      |

*Note.* Analyses centered age on 60 years and attained SES (t-scored) on 50. Attained SES in this table corresponds to household-level Attained SES

Table S2

*Mixed Effects Regression Analyses including Attained SES Linear and Quadratic Terms*

| <b>Effect</b>            | <b>B</b> | <b>SE (B)</b> | <b>DF</b> | <b>t</b> | <b>p</b> |
|--------------------------|----------|---------------|-----------|----------|----------|
| <b>Synonyms</b>          |          |               |           |          |          |
| Intercept                | 48.128   | 0.27          | 2221      | 179.36   | <.01     |
| Sex                      | -1.244   | 0.33          | 1998      | -3.73    | <.01     |
| Age (years)              | -0.132   | 0.01          | 1998      | -9.61    | <.01     |
| Rearing SES (linear)     | 0.164    | 0.02          | 1998      | 8.53     | <.01     |
| Attained SES (linear)    | 0.251    | 0.02          | 1998      | 14.42    | <.01     |
| Attained SES (quadratic) | 0.001    | 0.00          | 1998      | 0.75     | .45      |
| <b>Symbol Digit</b>      |          |               |           |          |          |
| Intercept                | 45.836   | 0.23          | 3778      | 203.21   | <.01     |
| Sex                      | -0.549   | 0.01          | 3115      | -46.45   | <.01     |
| Age (years)              | 0.907    | 0.24          | 3115      | 3.85     | <.01     |
| Rearing SES (linear)     | 0.108    | 0.01          | 3115      | 7.91     | <.01     |
| Attained SES (linear)    | 0.230    | 0.01          | 3115      | 18.59    | <.01     |
| Attained SES (quadratic) | -0.002   | 0.00          | 3115      | -1.31    | .19      |
| <b>Digits Forward</b>    |          |               |           |          |          |
| Intercept                | 49.525   | 0.20          | 3942      | 242.54   | <.01     |
| Sex                      | 0.223    | 0.24          | 3571      | 0.93     | 0.35     |
| Age (years)              | -0.050   | 0.01          | 3571      | -4.13    | <.01     |
| Rearing SES (linear)     | 0.088    | 0.01          | 3571      | 6.55     | <.01     |
| Attained SES (linear)    | 0.149    | 0.01          | 3571      | 11.85    | <.01     |
| Attained SES (quadratic) | 0.002    | 0.00          | 3571      | 1.42     | 0.15     |
| <b>Digits Backward</b>   |          |               |           |          |          |
| Intercept                | 48.973   | 0.19          | 4430      | 259.63   | <.01     |
| Sex                      | 0.322    | 0.22          | 3939      | 1.44     | 0.15     |
| Age (years)              | -0.130   | 0.01          | 3939      | -11.87   | <.01     |
| Rearing SES (linear)     | 0.088    | 0.01          | 3939      | 7.34     | <.01     |
| Attained SES (linear)    | 0.151    | 0.01          | 3939      | 13.06    | <.01     |
| Attained SES (quadratic) | 0.002    | 0.00          | 3939      | 1.58     | .11      |
| <b>Block Design</b>      |          |               |           |          |          |
| Intercept                | 46.086   | 0.45          | 1141      | 102.77   | <.01     |
| Sex                      | 0.693    | 0.44          | 906       | 1.57     | 0.12     |
| Age (years)              | -0.374   | 0.02          | 906       | -19.19   | <.01     |
| Rearing SES (linear)     | 0.121    | 0.03          | 906       | 4.27     | <.01     |
| Attained SES (linear)    | 0.194    | 0.03          | 906       | 7.58     | <.01     |
| Attained SES (quadratic) | 0.001    | 0.00          | 906       | 0.37     | .71      |

*Note.* Analyses centered age on 60 years and both rearing SES (t-scored) and attained SES (t-scored) are centered on 50. Sex is centered on Men. Mixed Effects regression models account for pair dependencies. Attained SES in this table corresponds to household-level Attained SES

Table S3

*Fit Statistics and Power for Attained SES moderation of cognitive performance: adjusted for mean-level sex effects*

| Model                                                         | Estimated Parameters | -2LL            | df           | AIC            | Sample-adjusted BIC | $\Delta\chi^2$ | $\Delta df$ | p-value         |
|---------------------------------------------------------------|----------------------|-----------------|--------------|----------------|---------------------|----------------|-------------|-----------------|
| <b>Synonyms N=4,307</b>                                       |                      |                 |              |                |                     |                |             |                 |
| Full ACE Bivariate Moderation Model                           | 28                   | 121073.6        | 16475        | 88131.0        | 14917.8             | 115.0          | 6           | 1.83E-22        |
| ACE Bivariate with no moderation effects                      | 22                   | 121188.6        | 16481        | 88232.8        | 14958.1             |                |             |                 |
| ACE Bivariate with only genetic moderation effects            | 24                   | 121102.4        | 16479        | 88150.6        | 14920.5             | 86.2           | 2           | 1.91E-19        |
| ACE Bivariate with only common environment moderation effects | 24                   | 121130.4        | 16479        | 88178.1        | 14934.3             | 58.2           | 2           | 2.30E-13        |
| ACE Bivariate with only unique environment moderation effects | 24                   | 121094.4        | 16479        | 88143.8        | 14917.1             | 94.2           | 2           | 3.51E-21        |
| AE Bivariate with moderation effects                          | 23                   | 121145.1        | 16480        | 88193.2        | 14940.0             | --             | --          | --              |
| CE Bivariate with moderation effects                          | 23                   | 121144.4        | 16480        | 88192.5        | 14939.7             | --             | --          | --              |
| <b>Only unique moderation*</b>                                | <b>25</b>            | <b>121081.8</b> | <b>16478</b> | <b>88132.8</b> | <b>14913.4</b>      | <b>106.8</b>   | <b>3</b>    | <b>5.36E-23</b> |
| Only common moderation                                        | 25                   | 121116.6        | 16478        | 88160.6        | 14930.8             | 72.0           | 3           | 1.59E-15        |
| Just Unique A moderation                                      | 23                   | 121106.2        | 16480        | 88152.1        | 14919.5             | 82.5           | 1           | 1.06E-19        |
| Just Unique C moderation                                      | 23                   | 121131.4        | 16480        | 88177.2        | 14932.0             | 57.2           | 1           | 3.94E-14        |
| Just Unique E moderation                                      | 23                   | 121095.7        | 16480        | 88143.2        | 14915.0             | 92.9           | 1           | 5.50E-22        |
| <b>Digits Forward N=7,860</b>                                 |                      |                 |              |                |                     |                |             |                 |
| Full ACE Bivariate Moderation Model                           | 28                   | 147385.9        | 20028        | 18235.5        | 18031.9             | 36.2           | 6           | 2.52E-06        |
| ACE Bivariate with no moderation effects                      | 22                   | 147422.1        | 20034        | 18237.0        | 18060.7             |                |             |                 |
| ACE Bivariate with only genetic moderation effects            | 24                   | 147403.9        | 20032        | 18233.4        | 18039.3             | 18.2           | 2           | 1.12E-04        |
| ACE Bivariate with only common environment moderation effects | 24                   | 147409.2        | 20032        | 18236.1        | --                  | 12.9           | 2           | 1.58E-03        |
| ACE Bivariate with only unique environment moderation effects | 24                   | 147397.3        | 20032        | 18230.1        | 18053.7             | 24.8           | 2           | 4.12E-06        |
| AE Bivariate with moderation effects                          | 23                   | 147449.0        | 20033        | 18253.2        | 18066.7             | --             | --          | --              |
| CE Bivariate with moderation effects                          | 23                   | 147436.5        | 20033        | 18247.0        | 18285.2             | --             | --          | --              |
| Only unique moderation                                        | 25                   | 147395.3        | 20031        | 18231.9        | 18052.9             | 26.8           | 3           | 6.48E-06        |
| Only common moderation                                        | 25                   | 147401.4        | 20031        | 18235.0        | 18042.4             | 20.6           | 3           | 1.27E-04        |
| Just Unique A moderation                                      | 23                   | 147411.1        | 20033        | 18234.3        | 18054.7             | 10.9           | 1           | 9.62E-04        |
| Just Unique C moderation                                      | 23                   | 147416.8        | 20033        | 18237.1        | --                  | 5.2            | 1           | 2.26E-02        |
| <b>Just Unique E moderation*</b>                              | <b>23</b>            | <b>147397.7</b> | <b>20033</b> | <b>18227.6</b> | <b>18051.3</b>      | <b>24.3</b>    | <b>1</b>    | <b>8.24E-07</b> |
| <b>Digits Backward N=8,722</b>                                |                      |                 |              |                |                     |                |             |                 |
| Full ACE Bivariate Moderation Model                           | 28                   | 153923.0        | 20890        | 112143.0       | 18235.5             | 64.2           | 6           | 6.28E-12        |
| ACE Bivariate with no moderation effects                      | 22                   | 153987.2        | 20896        | 112195.2       | 18237.0             |                |             |                 |
| ACE Bivariate with only genetic moderation effects            | 24                   | 153939.4        | 20894        | 112151.4       | 18233.4             | 47.9           | 2           | 3.97E-11        |
| ACE Bivariate with only common environment moderation effects | 24                   | 153972.4        | 20894        | 112184.4       | 18236.1             | 14.9           | 2           | 5.81E-04        |

| Model                                                         | Estimated Parameters | -2LL     | df    | AIC      | Sample-adjusted BIC | $\Delta\chi^2$ | $\Delta df$ | p-value  |
|---------------------------------------------------------------|----------------------|----------|-------|----------|---------------------|----------------|-------------|----------|
| ACE Bivariate with only unique environment moderation effects | 24                   | 153957.8 | 20894 | 112169.8 | 18230.1             | 29.4           | 2           | 4.13E-07 |
| AE Bivariate with moderation effects                          | 23                   | 154002.2 | 20895 | 112212.2 | 18253.2             | --             | --          | --       |
| CE Bivariate with moderation effects                          | 23                   | 153997.1 | 20895 | 112207.1 | 18247.0             | --             | --          | --       |
| Only unique moderation                                        | 25                   | 153960.1 | 20893 | 112174.1 | 18231.9             | 27.2           | 3           | 5.35E-06 |
| Only common moderation*                                       | 25                   | 153933.5 | 20893 | 112147.5 | 18235.0             | 53.8           | 3           | 1.24E-11 |
| Just Unique A moderation                                      | 23                   | 153974.7 | 20895 | 112184.7 | 18234.3             | 12.6           | 1           | 3.86E-04 |
| Just Unique C moderation                                      | 23                   | 153977.9 | 20895 | 112187.9 | 18237.1             | 9.3            | 1           | 2.29E-03 |
| Just Unique E moderation                                      | 23                   | 153962.9 | 20895 | 112172.9 | 18227.6             | 24.3           | 1           | 8.24E-07 |
| Block Design N=2,148                                          |                      |          |       |          |                     |                |             |          |
| Full ACE Bivariate Moderation Model                           | 28                   | 105858.1 | 14316 | 77226.1  | 19117.2             | 31.2           | 6           | 2.32E-05 |
| ACE Bivariate with no moderation effects                      | 22                   | 105889.4 | 14322 | 77245.4  | 19132.7             | --             | --          | --       |
| ACE Bivariate with only genetic moderation effects*           | 24                   | 105870.0 | 14320 | 77230.0  | 19114.3             | 19.4           | 2           | 6.13E-05 |
| ACE Bivariate with only common environment moderation effects | 24                   | 105877.1 | 14320 | 77237.1  | 19130.8             | 12.2           | 2           | 2.24E-03 |
| ACE Bivariate with only unique environment moderation effects | 24                   | 105888.3 | 14320 | 77248.3  | 19123.5             | 1.0            | 2           | 6.07E-01 |
| AE Bivariate with moderation effects                          | 23                   | 105948.3 | 14321 | 77306.3  | 19143.0             | --             | --          | --       |
| CE Bivariate with moderation effects                          | 23                   | 105935.6 | 14321 | 77293.6  | 19140.4             | --             | --          | --       |
| Only unique moderation                                        | 25                   | 105878.3 | 14319 | 77240.3  | 19127.4             | 11.0           | 3           | 1.17E-02 |
| Only common moderation                                        | 25                   | 105867.0 | 14319 | 77229.0  | 19114.1             | 22.3           | 3           | 5.65E-05 |
| Just Unique A moderation                                      | 23                   | 105882.7 | 14321 | 77240.7  | 19129.2             | 6.6            | 1           | 1.02E-02 |
| Just Unique C moderation                                      | 23                   | 105880.4 | 14321 | 77238.4  | 19130.8             | 8.9            | 1           | 2.85E-03 |
| Just Unique E moderation                                      | 23                   | 105889.1 | 14321 | 77247.1  | 19123.3             | 0.3            | 1           | 5.84E-01 |
| Symbol Digit N= 7,019                                         |                      |          |       |          |                     |                |             |          |
| Full AcE Bivariate Moderation Model*                          | 24                   | 142343.5 | 19191 | 103961.5 | 18031.9             | 79.7           | 4           | 2.02E-16 |
| AcE Bivariate with no moderation effects                      | 20                   | 142423.2 | 19195 | 104033.2 | 18060.7             | --             | --          | --       |
| AcE Bivariate with only genetic moderation effects            | 22                   | 142369.2 | 19193 | 103983.2 | 18039.3             | 54.0           | 2           | 2.02E-16 |
| AcE Bivariate with only common environment moderation effects | --                   | --       | --    | --       | --                  | --             | --          | --       |
| AcE Bivariate with only unique environment moderation effects | 22                   | 142398.1 | 19193 | 104012.1 | 18053.7             | 25.1           | 2           | 1.88E-12 |
| AE Bivariate with moderation effects                          | 23                   | 142418.6 | 19192 | 104034.6 | 18066.7             | --             | --          | --       |
| cE Bivariate with moderation effects                          | 19                   | 142877.7 | 19196 | 104485.7 | 18285.2             | --             | --          | 3.54E-06 |
| Only unique moderation                                        | 22                   | 142396.4 | 19193 | 104010.4 | 18052.9             | 26.8           | 2           | --       |
| Only common moderation                                        | 22                   | 142375.5 | 19193 | 103989.5 | 13284.3             | 47.7           | 2           | --       |
| Just Unique A moderation                                      | 21                   | 142405.6 | 19194 | 104017.6 | 13286.6             | 17.6           | 1           | 1.52E-06 |
| Just Unique C moderation                                      | --                   | --       | --    | --       | 13285.4             | --             | --          | 4.39E-11 |
| Just Unique E moderation                                      | 21                   | 142398.9 | 19194 | 104010.9 | 13289.8             | 24.3           | 1           | 2.73E-05 |

Table S4

Estimated parameters from Attained SES moderation of Cognitive Performance, best fitting model with confidence intervals

| Estimated Model Parameters                            | Synonyms<br>N= 4,307 |            |            | Digits Forward<br>N= 7,860 |            |            | Digits Backward<br>N= 8,722 |            |            | Block Design<br>N=2,148 |            |            | Symbol Digit<br>N= 7,019 |            |            |
|-------------------------------------------------------|----------------------|------------|------------|----------------------------|------------|------------|-----------------------------|------------|------------|-------------------------|------------|------------|--------------------------|------------|------------|
|                                                       | Estimate             | LL<br>2.5% | UL<br>2.5% | Estimate                   | LL<br>2.5% | UL<br>2.5% | Estimate                    | LL<br>2.5% | UL<br>2.5% | Estimate                | LL<br>2.5% | UL<br>2.5% | Estimate                 | LL<br>2.5% | UL<br>2.5% |
| <b>Cognitive Performance</b>                          |                      |            |            |                            |            |            |                             |            |            |                         |            |            |                          |            |            |
| <b>Common Variance Pathways</b>                       |                      |            |            |                            |            |            |                             |            |            |                         |            |            |                          |            |            |
| <b>A</b>                                              |                      |            |            |                            |            |            |                             |            |            |                         |            |            |                          |            |            |
| <i>Genetic variance</i>                               | 4.55*                | 2.38       | 6.72       | 2.01                       | .23        | 3.79       | -2.78*                      | -3.57      | -1.99      | 4.23*                   | 1.36       | 7.10       | 6.76*                    | 5.92       | 7.60       |
| SES moderation of A                                   | -                    | -          | -          | -                          | -          | -          | -.18*                       | -.23       | -.13       | .26*                    | .16        | .37        | -.18*                    | -.23       | -.14       |
| Age moderation of A                                   | .19                  | 1.18       | 1.56       | -.38                       | -1.38      | .62        | -.03                        | -.64       | .58        | -.19                    | 1.01       | .64        | -1.13*                   | 1.60       | -.67       |
| Age sq moderation of A*                               | -                    | -          | -          | -                          | -          | -          | -                           | -          | -          | -                       | -          | -          | .86*                     | .59        | 1.13       |
| <b>C</b>                                              |                      |            |            |                            |            |            |                             |            |            |                         |            |            |                          |            |            |
| <i>shared environmental variance</i>                  | 3.90*                | 2.56       | 5.24       | 2.10*                      | .84        | 3.36       | 1.81*                       | 1.07       | 2.55       | 3.04*                   | .82        | 5.26       | -                        | -          | -          |
| SES moderation of C                                   | -                    | -          | -          | -                          | -          | -          | -.05                        | -.11       | .001       | -                       | -          | -          | -                        | -          | -          |
| Age moderation of C                                   | 1.36*                | .53        | 2.18       | .16                        | -.45       | .77        | .64*                        | .22        | 1.06       | .82                     | -.39       | 2.02       | -                        | -          | -          |
| <b>E</b>                                              |                      |            |            |                            |            |            |                             |            |            |                         |            |            |                          |            |            |
| <i>nonshared environmental variance</i>               | .25                  | -.20       | .70        | .19                        | -.17       | .55        | .10                         | -.20       | .41        | .61                     | .02        | 1.20       | .18                      | -.19       | .56        |
| SES moderation of E                                   | -                    | -          | -          | -                          | -          | -          | -.02                        | -.05       | .01        | -                       | -          | -          | .08*                     | .05        | .12        |
| Age moderation of E                                   | -.02                 | -.36       | .31        | -.002                      | -.27       | .27        | .21                         | -.04       | .46        | .04                     | -.35       | .43        | -.59*                    | -.90       | -.28       |
| Age sq moderation of E*                               | -                    | -          | -          | -                          | -          | -          | -                           | -          | -          | -                       | -          | -          | .42*                     | .23        | .62        |
| <b>Cognitive Performance Unique Variance Pathways</b> |                      |            |            |                            |            |            |                             |            |            |                         |            |            |                          |            |            |
| <b>A</b>                                              |                      |            |            |                            |            |            |                             |            |            |                         |            |            |                          |            |            |
| <i>Genetic variance</i>                               | 5.38*                | 4.20       | 6.57       | 5.02*                      | 3.89       | 6.16       | 4.19*                       | 2.50       | 5.87       | 5.44*                   | 3.60       | 7.29       | 4.41*                    | 3.25       | 5.57       |
| SES moderation of A                                   | -.06                 | -.13       | .01        | -                          | -          | -          | -                           | -          | -          | -.13                    | -.25       | .00        | .16*                     | .11        | .21        |
| Age moderation of A                                   | .70                  | -.55       | 1.96       | -.70                       | -1.44      | .04        | -1.32                       | -2.39      | -.26       | -.56                    | 1.50       | .39        | 2.36*                    | 1.54       | 3.18       |
| Age sq moderation of A*                               | -                    | -          | -          | -                          | -          | -          | -                           | -          | -          | -                       | -          | -          | .39                      | .04        | .74        |

| Estimated Model Parameters              | Synonyms<br>N= 4,307 |            |            | Digits Forward<br>N= 7,860 |            |            | Digits Backward<br>N= 8,722 |            |            | Block Design<br>N=2,148 |            |            | Symbol Digit<br>N= 7,019 |            |            |
|-----------------------------------------|----------------------|------------|------------|----------------------------|------------|------------|-----------------------------|------------|------------|-------------------------|------------|------------|--------------------------|------------|------------|
|                                         | Estimate             | LL<br>2.5% | UL<br>2.5% | Estimate                   | LL<br>2.5% | UL<br>2.5% | Estimate                    | LL<br>2.5% | UL<br>2.5% | Estimate                | LL<br>2.5% | UL<br>2.5% | Estimate                 | LL<br>2.5% | UL<br>2.5% |
| <b>C</b>                                |                      |            |            |                            |            |            |                             |            |            |                         |            |            |                          |            |            |
| <i>shared environmental variance</i>    | .85                  | 1.07       | 2.77       | 2.59*                      | .88        | 4.31       | 2.33                        | .22        | 4.44       | 5.60*                   | 4.03       | 7.16       | -                        | -          | -          |
| SES moderation of C                     | -.08                 | -.16       | -.01       | -                          | -          | -          | -                           | -          | -          | -                       | -          | -          | -                        | -          | -          |
| Age moderation of C                     | -2.10*               | 2.79       | 1.42       | .47                        | -.42       | 1.21       | .89                         | .09        | 1.69       | -2.69*                  | 3.70       | 1.69       | -                        | -          | -          |
| <b>E</b>                                |                      |            |            |                            |            |            |                             |            |            |                         |            |            |                          |            |            |
| <i>nonshared environmental variance</i> | 6.21*                | 5.85       | 6.57       | 7.48*                      | 7.23       | 7.73       | 7.63*                       | 7.36       | 7.90       | 5.68*                   | 5.26       | 6.11       | 6.02*                    | 5.73       | 6.32       |
| SES moderation of E                     | -.08*                | -.12       | -.05       | .04*                       | .03        | .06        | -                           | -          | -          | -                       | -          | -          | -.03                     | -.05       | 0.000      |
| Age moderation of E                     | .44*                 | .14        | .75        | .15                        | -.06       | .36        | .21                         | .02        | .39        | .57*                    | .30        | .85        | .16                      | -.04       | .37        |
| Age sq moderation of E*                 | -                    | -          | -          | -                          | -          | -          | -                           | -          | -          | -                       | -          | -          | -.11                     | -.25       | .03        |
| <b>Attained SES</b>                     |                      |            |            |                            |            |            |                             |            |            |                         |            |            |                          |            |            |
| <b>Unique Variance Pathways</b>         |                      |            |            |                            |            |            |                             |            |            |                         |            |            |                          |            |            |
| <b>A</b>                                |                      |            |            |                            |            |            |                             |            |            |                         |            |            |                          |            |            |
| <i>Genetic variance</i>                 | 4.07*                | 3.05       | 5.09       | 4.08*                      | 3.03       | 5.13       | -3.92*                      | -4.96      | -2.89      | 2.92*                   | 1.61       | 4.22       | 4.70*                    | 4.26       | 5.13       |
| Age moderation of A                     | -1.02*               | 1.48       | -.56       | -1.04*                     | -1.51      | -.56       | 1.27*                       | .86        | 1.67       | -1.73*                  | 2.18       | 1.28       | 1.14*                    | .86        | 1.43       |
| <b>C</b>                                |                      |            |            |                            |            |            |                             |            |            |                         |            |            |                          |            |            |
| <i>shared environmental variance</i>    | 4.67*                | 3.94       | 5.40       | 4.66*                      | 3.91       | 5.40       | 4.63*                       | 3.90       | 5.36       | 5.05*                   | 4.45       | 5.65       | 3.87*                    | 3.38       | 4.37       |
| Age moderation of C                     | .97*                 | .60        | 1.34       | .97*                       | .60        | 1.35       | 1.08*                       | .72        | 1.44       | .94*                    | .52        | 1.35       | -.75*                    | 1.13       | -.37       |
| <b>E</b>                                |                      |            |            |                            |            |            |                             |            |            |                         |            |            |                          |            |            |
| <i>nonshared environmental variance</i> | 7.73*                | 7.53       | 7.93       | 7.73*                      | 7.53       | 7.93       | 7.75*                       | 7.56       | 7.94       | 7.82*                   | 7.64       | 8.01       | 7.73*                    | 7.57       | 7.90       |
| Age moderation of E                     | -.20*                | -.33       | -.07       | -.19*                      | -.32       | -.07       | -.17*                       | -.29       | -.05       | -.16                    | -.29       | -.03       | -.49*                    | -.61       | -.36       |

Note. LL= Lower Limit Confidence Interval, UL= Upper Limit Confidence Interval. \*< p=.01, a conservative *p*-value is noted given large sample sizes.

Table S5

*Parameter estimates for household-level Attained SES moderation of Symbol Digit performance by region, adjusted for age moderation, and average effects of sex.*

| Region      | Additive Genetic |       |       |              |              | Shared Environment |       |       |              |              | Nonshared Environment |       |       |              |              |
|-------------|------------------|-------|-------|--------------|--------------|--------------------|-------|-------|--------------|--------------|-----------------------|-------|-------|--------------|--------------|
|             | $a_{SES}$        | $a_C$ | $a_U$ | $\beta_{XC}$ | $\beta_{XU}$ | $c_{SES}$          | $c_C$ | $c_U$ | $\beta_{YC}$ | $\beta_{YU}$ | $e_{SES}$             | $e_C$ | $e_U$ | $\beta_{ZC}$ | $\beta_{ZU}$ |
| USA         | 2.93             | 1.71  | 7.81  | .15          | -.15         | 4.31               | 0     | 0     | 0            | 0            | 8.61                  | .93   | 6.05  | .00          | -.05         |
| Scandinavia | 4.55             | 7.22  | 4.57  | -.20         | .16          | 3.98               | 0     | 0     | 0            | 0            | 7.52                  | .56   | 5.85  | .08          | -.02         |
| Full Sample | 4.29             | 6.73  | 4.93  | -.21         | .15          | 4.10               | 0     | 0     | 0            | 0            | 7.77                  | .69   | 5.92  | .08          | -.02         |

*Note.* The parameter estimates follow from a bivariate GxE model (see Figure 1 of the main paper). Path estimates  $a_{SES}$ ,  $c_{SES}$ ,  $e_{SES}$  reflect genetic and environmental influences on attained SES, while  $a_C$ ,  $a_U$ ,  $e_C$ ,  $e_U$  reflect genetic and environmental influences on cognitive performance. Paths subscripted with ‘c’, i.e.,  $a_C$  and  $e_C$ , indicate influences in common between attained SES and cognition. Paths subscripted with ‘u’,  $a_U$  and  $e_U$ , reflect influences unique to cognitive performance. Regression weights,  $\beta_{XC}$  and  $\beta_{ZC}$  reflect the moderating effect of attained SES on variance it shares in common with cognitive performance, while  $\beta_{XU}$  and  $\beta_{ZU}$  indicate the moderating effect of attained SES on variance unique to cognitive performance. In this case, due to evidence of non-additive genetic influences in Symbol Digit performance (Pahlen et al., 2018), shared environmental paths ( $c_C$ ,  $c_U$ ) and paths reflecting moderating effects of attained SES on shared environmental influences ( $\beta_{YC}$  and  $\beta_{YU}$ ) are not estimated and thus fixed to zero. Regional differences are confounded with test type, as the U.S. samples used Digit Symbol and the Scandinavian samples used Symbol Digit.

Table S6

*Testing for direction of moderation: subsample with complete household-level Attained SES and cognitive test data.*

| SES --> Cog           | Full Model |                |           |           | No Moderation Model |                |           |           |
|-----------------------|------------|----------------|-----------|-----------|---------------------|----------------|-----------|-----------|
|                       | Parameters | Log-likelihood | AIC       | BIC       | Parameters          | Log-likelihood | AIC       | BIC       |
| Block Design          | 30         | -15463.50      | 30986.99  | 31132.85  | 15                  | -15703.54      | 31437.08  | 31510.00  |
| Digit Symbol          | 30         | -50797.84      | 101655.68 | 101837.54 | 15                  | -51605.79      | 103241.57 | 103332.51 |
| Digit Span - Forward  | 30         | -58930.82      | 117921.63 | 118108.21 | 15                  | -59720.20      | 119470.40 | 119563.69 |
| Digit Span - Backward | 30         | -65289.52      | 130639.03 | 130828.46 | 15                  | -66185.87      | 132401.75 | 132496.46 |
| Synonyms              | 30         | -32361.70      | 64783.40  | 64952.01  | 15                  | -32931.06      | 65892.13  | 65976.43  |

  

| Cog --> SES           | Full Model |                   |           |           | No Moderation Model |                |           |           |
|-----------------------|------------|-------------------|-----------|-----------|---------------------|----------------|-----------|-----------|
|                       | Parameters | -2 Log-likelihood | AIC       | BIC       | Parameters          | Log-likelihood | AIC       | BIC       |
| Block Design          | 30         | -15913.38         | 31886.76  | 32032.61  | 15                  | -15703.54      | 31437.08  | 31510.00  |
| Digit Symbol          | 30         | -53239.99         | 106539.97 | 106721.84 | 15                  | -51605.79      | 103241.57 | 103332.51 |
| Digit Span - Forward  | 30         | -62204.17         | 124468.35 | 124654.93 | 15                  | -59720.20      | 119470.40 | 119563.69 |
| Digit Span - Backward | 30         | -70046.63         | 140153.27 | 140342.69 | 15                  | -66185.87      | 132401.75 | 132496.46 |
| Synonyms              | 30         | -33753.55         | 67567.11  | 67735.71  | 15                  | -32931.06      | 65892.13  | 65976.43  |

*Note.* Pooled sample, adjusted for sex. AIC = Akaike information criterion; BIC = Bayesian information criterion; SES→COG = ACE Bivariate model where etiological influences in cognitive performance are linear functions of attained SES; COG→SES = ACE Bivariate model where etiological influences in attained SES are linear functions of cognitive performance



Table S7: *Twin Correlations and cross-trait correlations for attained SES and cognitive test scores by Birth Cohorts before and after 1940*

| Trait                               | <i>Complete pairs<br/>(incomplete pairs)</i> |              |             | <b>Within-Trait Twin<br/>Correlations</b> |      |       | <b>Cross-Trait<br/>Correlations between<br/>Attained SES &amp; Cognitive<br/>Tests</b> |      |      |
|-------------------------------------|----------------------------------------------|--------------|-------------|-------------------------------------------|------|-------|----------------------------------------------------------------------------------------|------|------|
|                                     | MZ                                           | SSDZ         | OSDZ        | MZ                                        | SSDZ | OSDZ  | MZ                                                                                     | SSDZ | OSDZ |
| <b>Birth Cohort<br/>1893 - 1939</b> |                                              |              |             |                                           |      |       |                                                                                        |      |      |
| Attained SES                        | 1073                                         | 1337         | 516         | 0.42                                      | 0.34 | 0.33  | .                                                                                      | .    | .    |
| Rearing SES*                        | 983<br>(7)                                   | 1228<br>(8)  | 510         |                                           |      |       | 0.28                                                                                   | 0.36 | 0.31 |
| Synonyms (SYN)                      | 150<br>(65)                                  | 225<br>(110) | 201<br>(39) | 0.73                                      | 0.23 | 0.35  | 0.36                                                                                   | 0.22 | 0.29 |
| Digits Forward (DF)                 | 767<br>(140)                                 | 936<br>(264) | 244<br>(13) | 0.36                                      | 0.27 | 0.13  | 0.18                                                                                   | 0.13 | 0.19 |
| Digits Backward<br>(DB)             | 791<br>(145)                                 | 950<br>(276) | 258<br>(16) | 0.37                                      | 0.21 | 0.28  | 0.22                                                                                   | 0.14 | 0.12 |
| Block Design (BD)                   | 278<br>(63)                                  | 311<br>(121) | 203<br>(39) | 0.61                                      | 0.35 | -0.14 | 0.27                                                                                   | 0.13 | 0.07 |
| Symbol Digit (SD)                   | 748<br>(184)                                 | 815<br>(344) | 356<br>(83) | 0.60                                      | 0.37 | 0.37  | 0.21                                                                                   | 0.20 | 0.21 |
| <b>Birth Cohort<br/>1940 -1971</b>  |                                              |              |             |                                           |      |       |                                                                                        |      |      |
| Attained SES                        | 1286                                         | 1286         | 476         | 0.36                                      | 0.26 | 0.21  | .                                                                                      | .    | .    |
| Rearing SES*                        | 1366<br>(3)                                  | 1276<br>(1)  | 472         |                                           |      |       | 0.22                                                                                   | 0.25 | 0.26 |
| Synonyms (SYN)                      | 718<br>(3)                                   | 728<br>(12)  | .           | 0.60                                      | 0.41 | .     | 0.27                                                                                   | 0.19 | .    |
| Digits Forward (DF)                 | 755<br>(6)                                   | 644<br>(9)   | 366<br>(4)  | 0.47                                      | 0.29 | 0.23  | 0.17                                                                                   | 0.13 | 0.14 |
| Digits Backward<br>(DB)             | 879<br>(51)                                  | 745<br>(38)  | 447<br>(29) | 0.40                                      | 0.22 | 0.22  | 0.14                                                                                   | 0.11 | 0.15 |
| Block Design (BD)                   | 96<br>(9)                                    | 67<br>(6)    | .           | 0.71                                      | 0.58 | .     | 0.17                                                                                   | 0.12 | .    |
| Symbol Digit (SD)                   | 479<br>(26)                                  | 423<br>(19)  | 351<br>(19) | 0.56                                      | 0.20 | 0.19  | 0.23                                                                                   | 0.17 | 0.19 |

*Note.* Correlations estimated in Mx, restricting sample to pairs with complete data on Attained SES scores.

MZ= Monozygotic, SSDZ=Same-Sex Dizygotic, OSDZ=Opposite-Sex Dizygotic. Included incomplete twin pairs e.g. one twin without cognitive assessment in parentheses

\*Rearing SES is correlated with attained SES. Correlations were fixed within pairs and allowed to vary between zygositys.

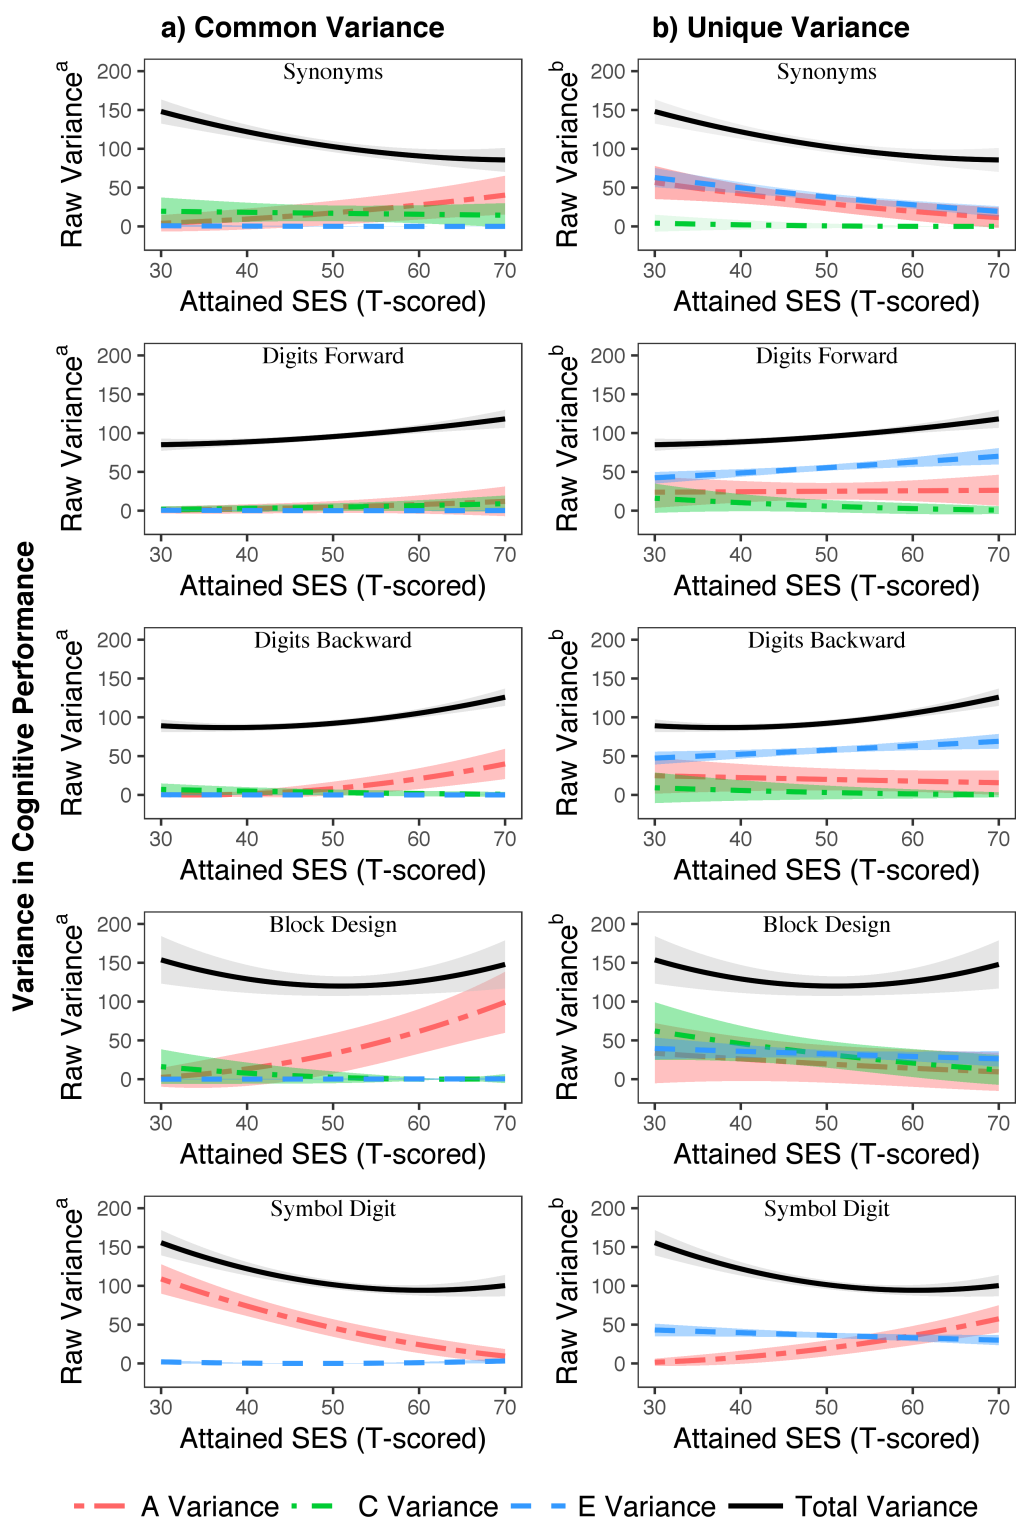

Figure S1. Raw Variances in cognitive performance for the Full Moderation Model with household-level Attained SES

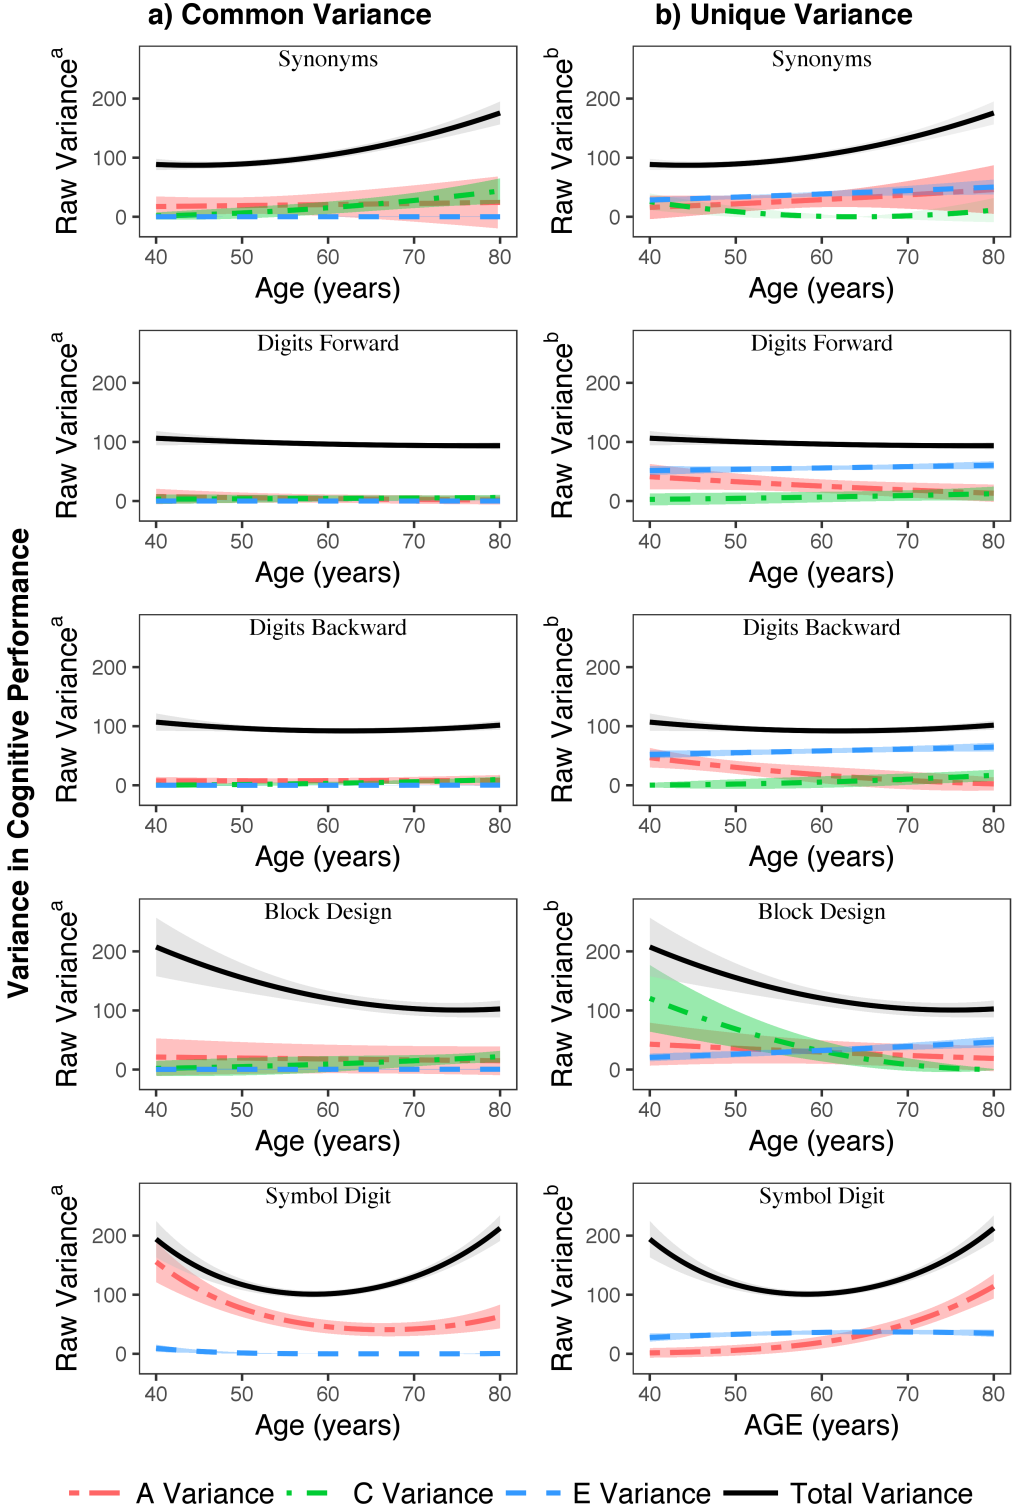

Figure S2. Raw Variances in cognitive performance by Age, adjusted for household-level Attained SES moderation. Age moderation for performance on Symbol Digit includes a nonlinear term.

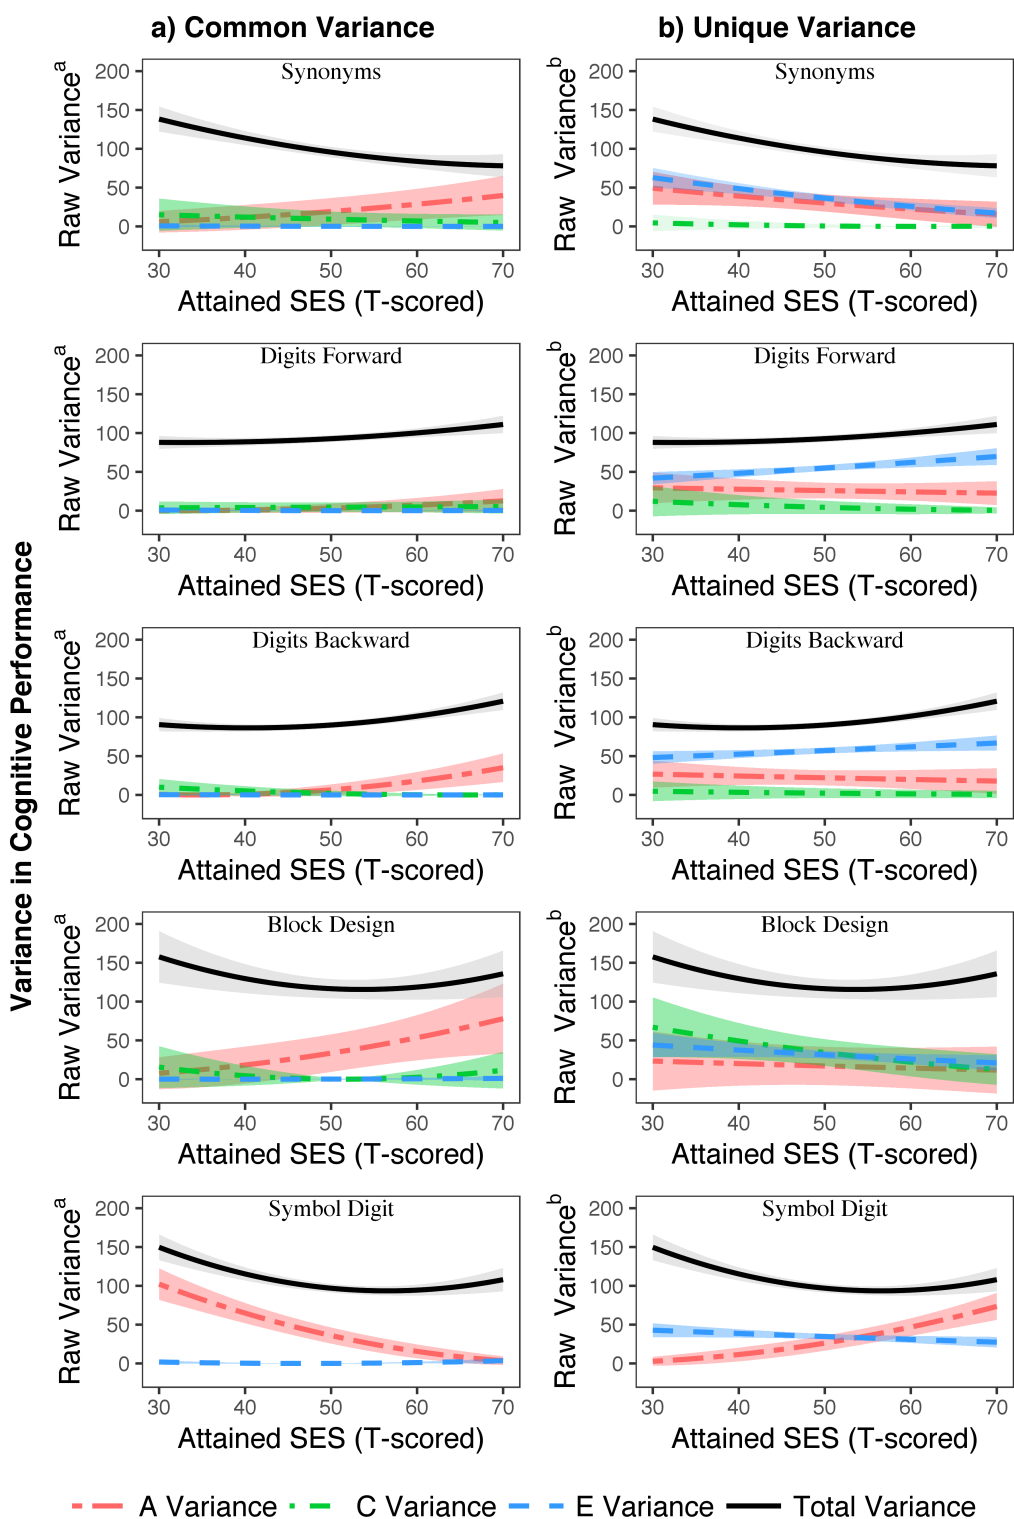

Figure S3. Raw Variances in cognitive performance by household-level attained SES, adjusted for rearing SES & Age moderation.

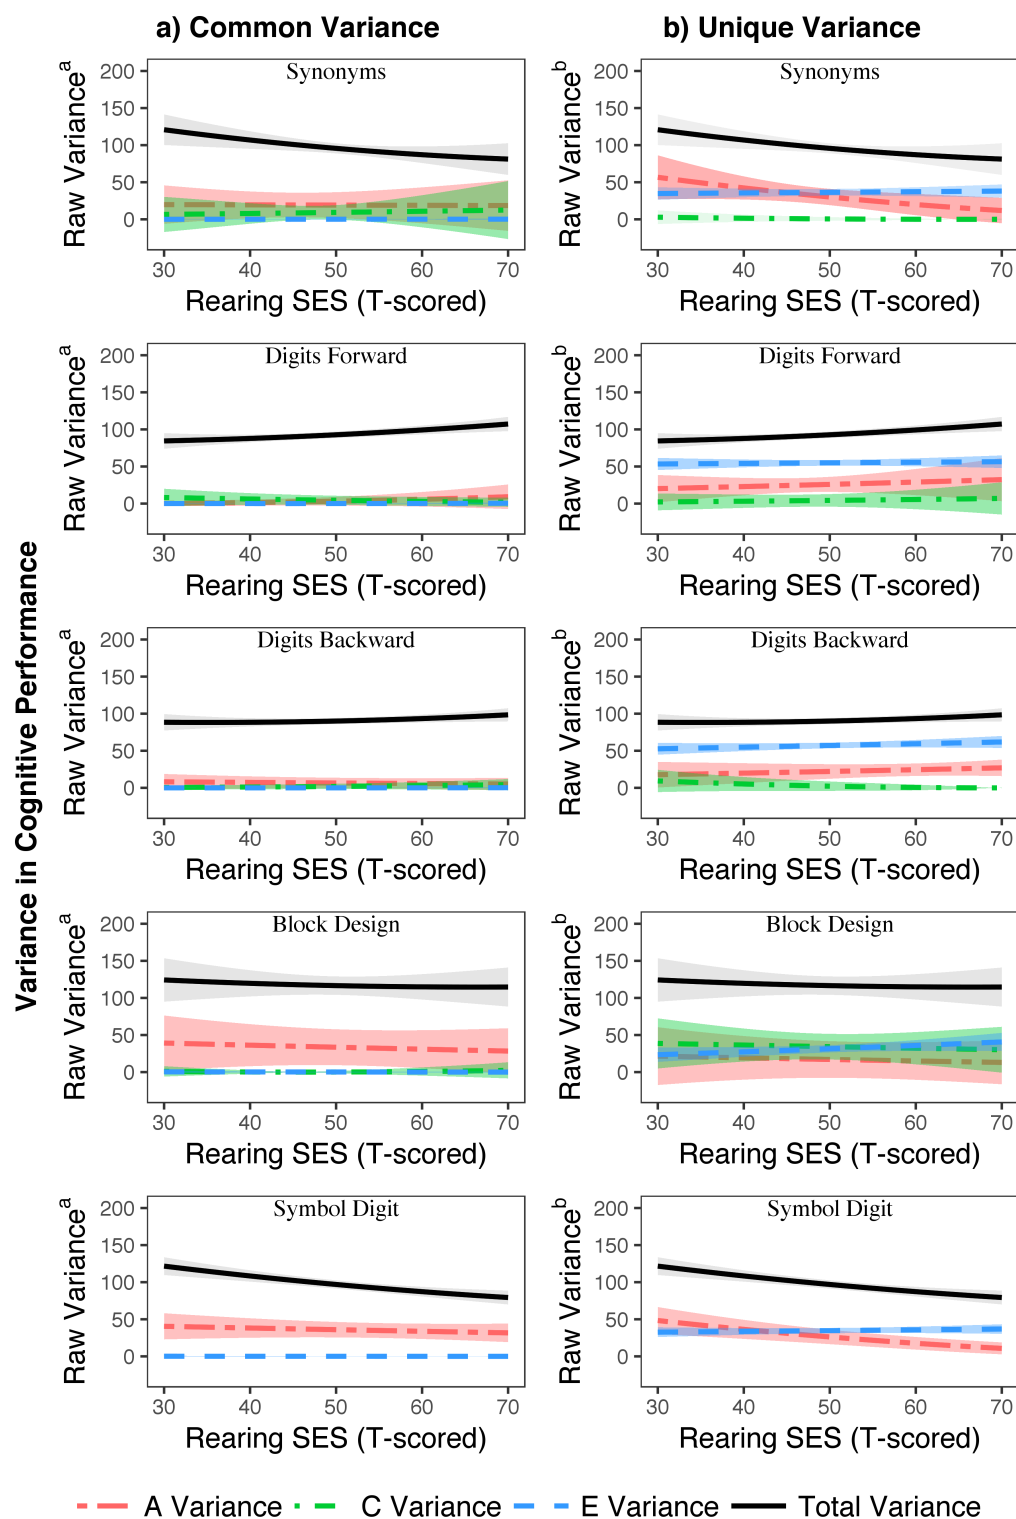

Figure S4. Raw Variances in cognitive performance by rearing SES in the full bivariate moderation model, adjusted for household level attained SES & Age moderation.

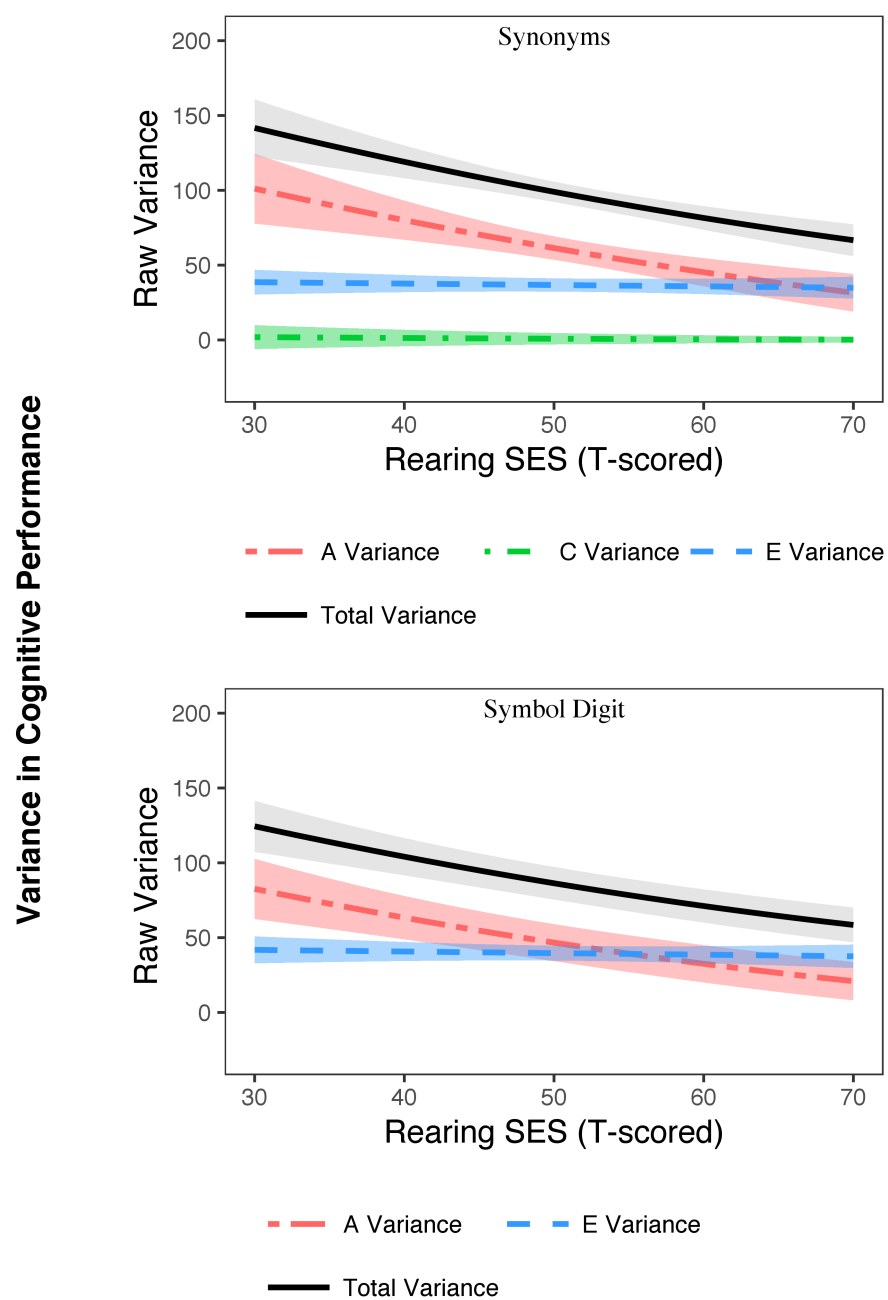

*Figure S5.* Raw Variances in cognitive performance moderated by rearing SES, univariate model adjusted for age moderation and mean-level sex effects.

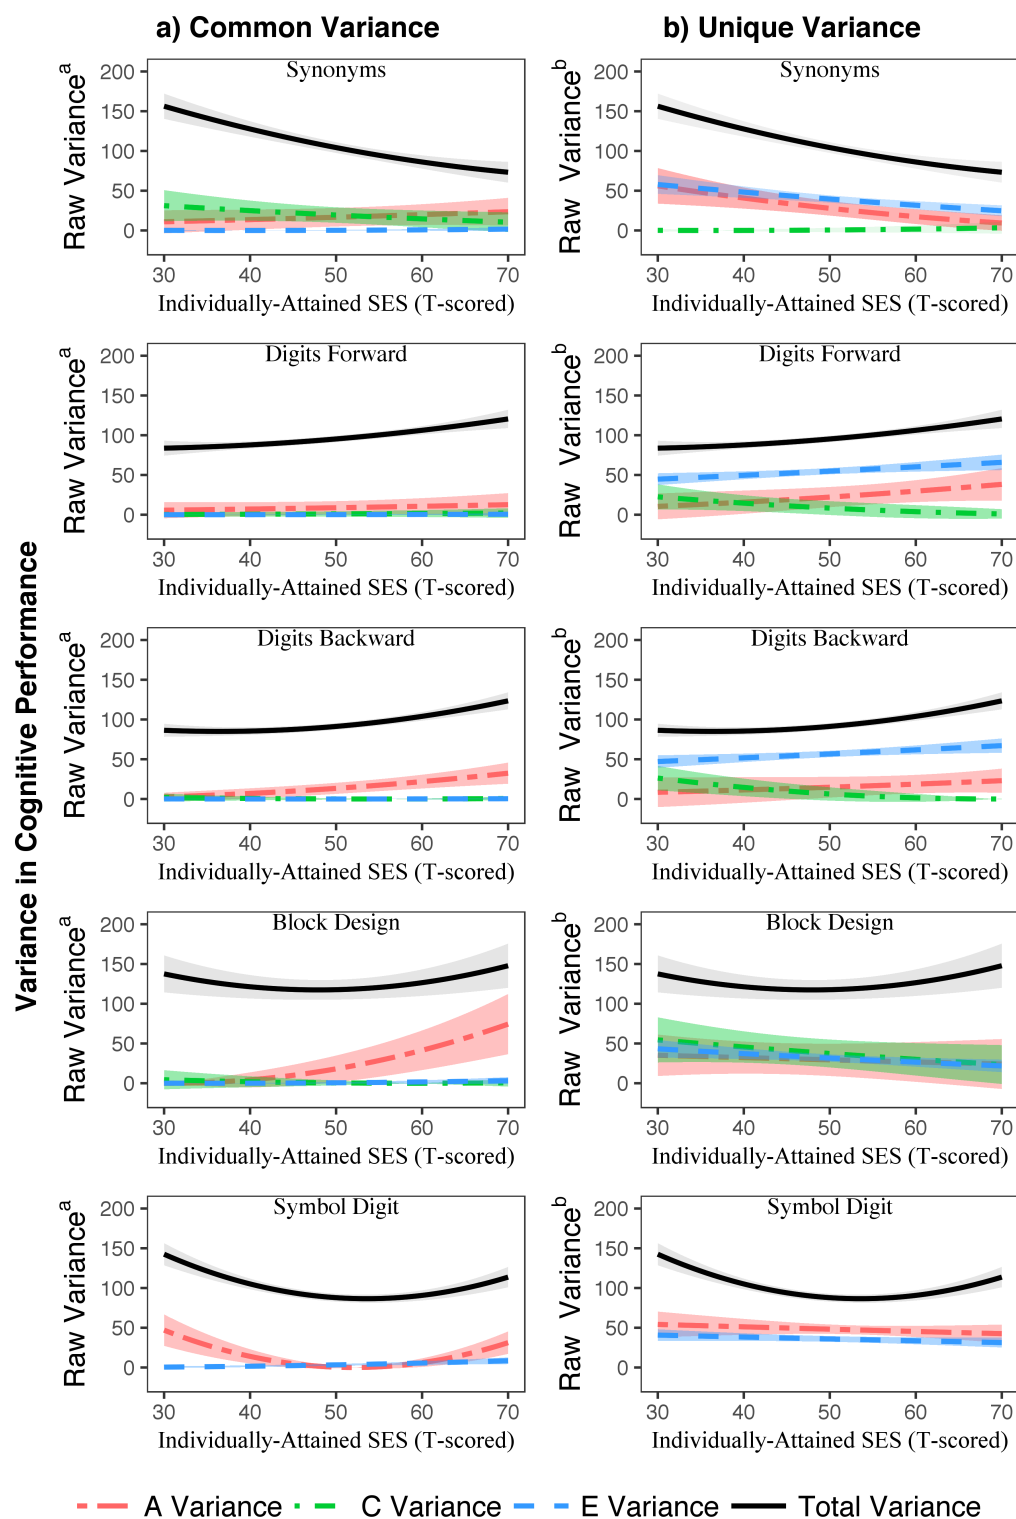

Figure S6. Raw Variances in cognitive performance for the Full Moderation Model with participant's individually-attained SES.

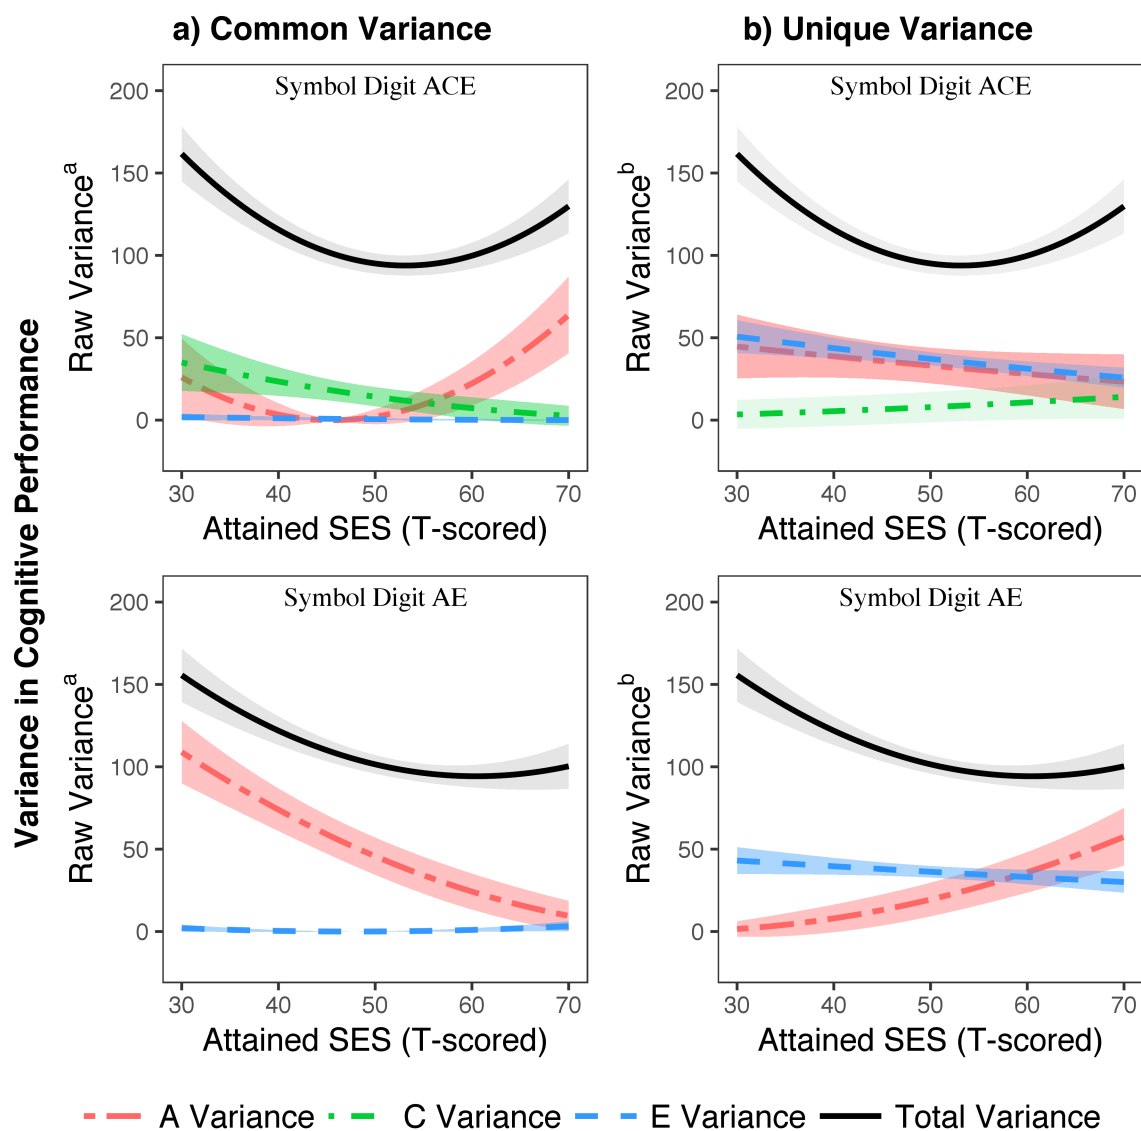

*Figure S7: Full Bivariate Moderation model comparison for Symbol Digit, using an ACE model for Symbol Digit on the top row and the AE model (no C for cognitive) on the bottom row. Please note, estimates for the ACE model should be interpreted with caution, given analyses in a previous study with the same sample indicating possible dominance genetic effects (Pahlen et al., 2018)*



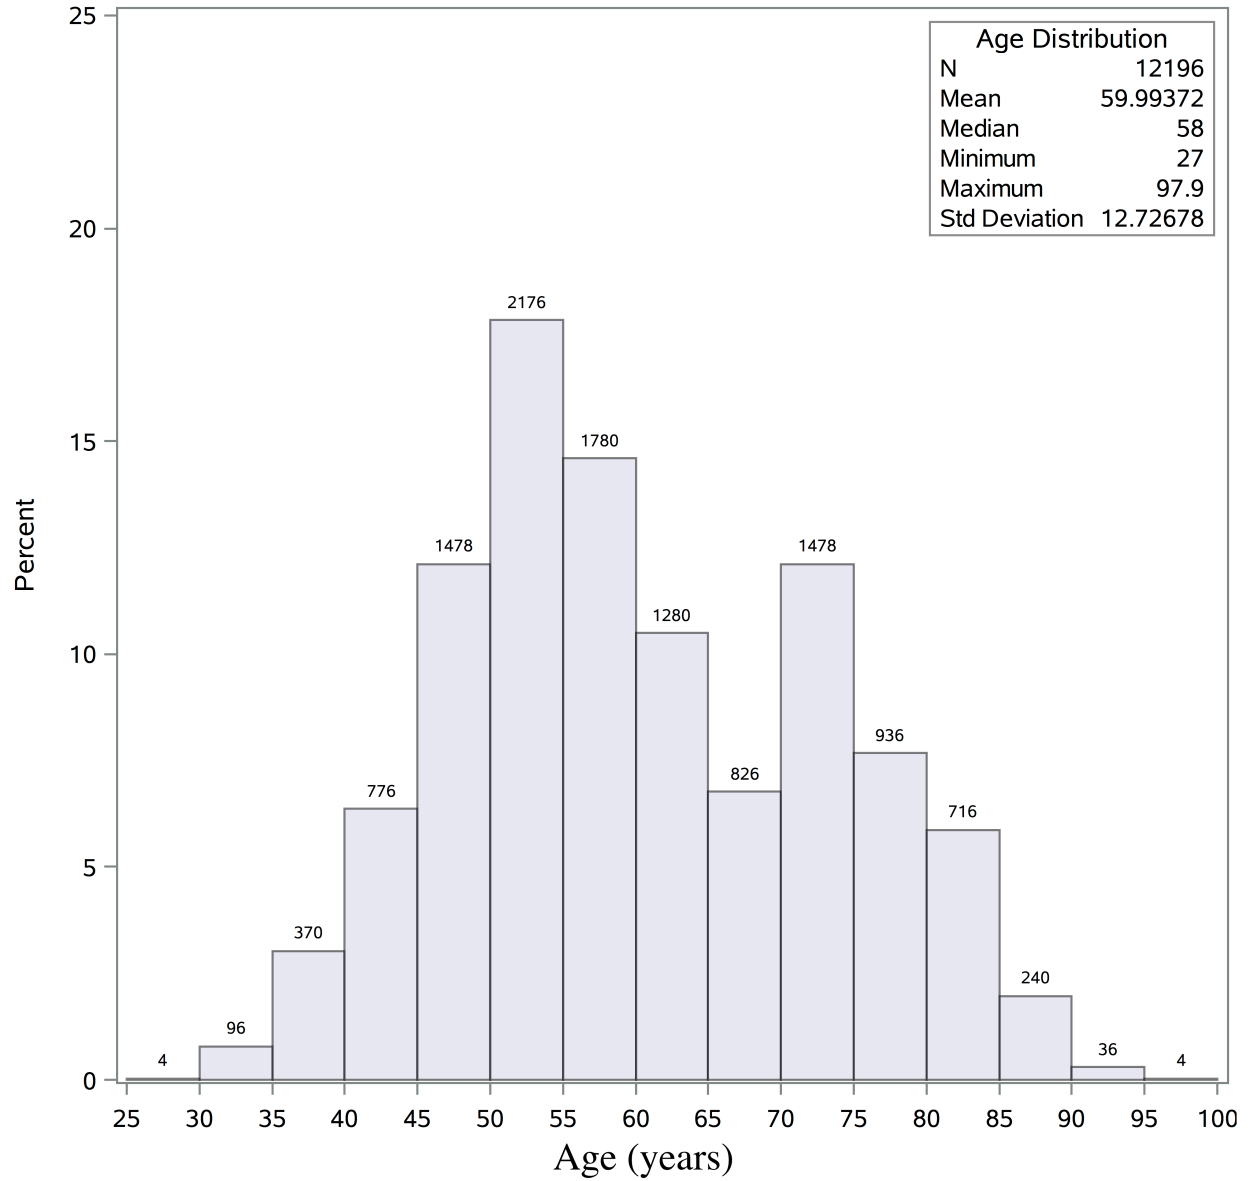

*Figure S8:* Distribution of participants' ages. Due to the composition of the cohort studies in IGEMS, age is correlated about .96 with birth year.

## References

- Antonides, G. (2011). The Division of Household Tasks and Household Financial Management. *Zeitschrift Fur Psychologie-Journal of Psychology*, 219(4), 198-208. doi:10.1027/2151-2604/a000073
- Finkel, D., & Reynolds, C. A. (2009). Behavioral Genetic Investigations of Cognitive Aging. In Y.-K. Kim (Ed.), *Handbook of Behavior Genetics* (pp. 101-112): Springer New York.
- Johnson, W., Deary, I., McGue, M., & Christensen, K. (2009). Genetic and environmental transactions linking cognitive ability, physical fitness, and education in late life. *Psychology and Aging*, 24(1), 48-62. doi:10.1037/a0013929
- Johnson, W., & Krueger, R. (2005). Genetic Effects on Physical Health: Lower at Higher Income Levels. *Behavior Genetics*, 35(5), 579-590. doi:10.1007/s10519-005-3598-0
- Johnson, W., McGue, M., & Deary, I. J. (2014). Normative Cognitive Aging. In D. Finkel & C. A. Reynolds (Eds.), *Behavior Genetics of Cognition Across the Lifespan* (Vol. 1, pp. 135-167). New York, NY: Springer.
- Pahlen, S., Hamdi, N. R., Dahl Aslan, A. K., Horwitz, B. N., Panizzon, M. S., Petersen, I., . . . McGue, M. (2018). Age-moderation of genetic and environmental contributions to cognitive functioning in mid- and late-life for specific cognitive abilities. *Intelligence*, 68, 70-81. doi:<https://doi.org/10.1016/j.intell.2017.12.004>
- Purcell, S. (2002). Variance Components Models for Gene–Environment Interaction in Twin Analysis. *Twin Research and Human Genetics*, 5(06), 554-571. doi:10.1375/136905202762342026

Reynolds, C. A., Finkel, D., McArdle, J. J., Gatz, M., Berg, S., & Pedersen, N. L. (2005).

Quantitative genetic analysis of latent growth curve models of cognitive abilities in adulthood. *Developmental Psychology*, *41*(1), 3-3. doi:10.1037/0012-1649.41.1.3

van der Sluis, S., Posthuma, D., & Dolan, C. V. (2012). A Note on False Positives and Power in  $G \times E$  Modelling of Twin Data. *Behavior Genetics*, *42*(1), 170-186.

doi:10.1007/s10519-011-9480-3
